# Supplementary material
Source: PubMed Central journal article supplement (PMC3642684)
Supplement: emboj201376df3b.pdf [file emboj201376df3b.pdf]

Upper panel

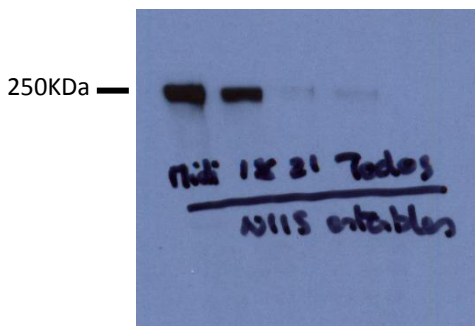

Control 1 2 pool

MAP1B-shRNA

Intermediate panel 1

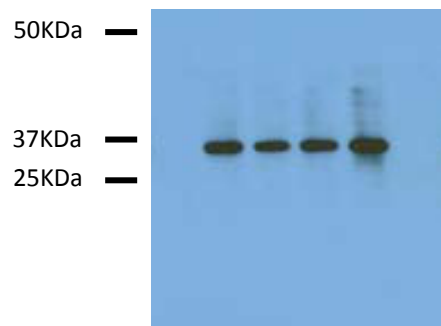

Control 1 2 pool

MAP1B-shRNA

Intermediate panel 2

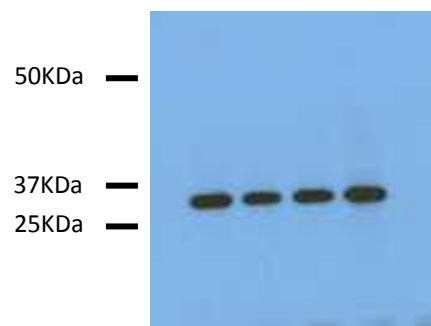

Control 1 2 pool

MAP1B-shRNA

Lower panel

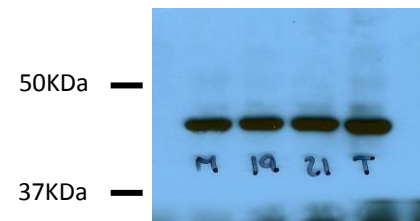

Control 1 2 pool

MAP1B-shRNA

Figure 3 B
