# Supplementary material
Source: PubMed Central journal article supplement (PMC3642684)

Upper panel

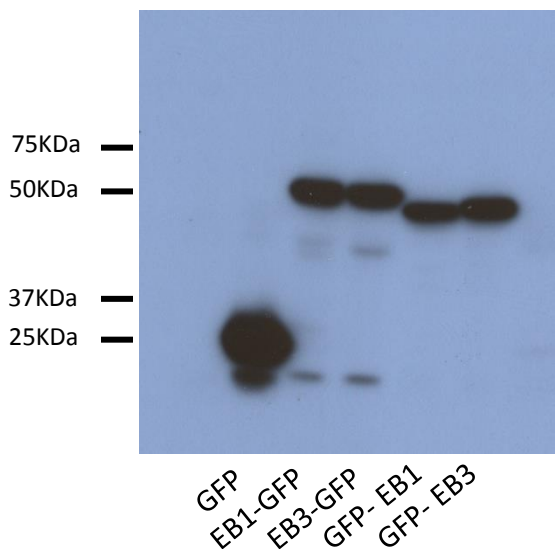

Intermediate panel 1

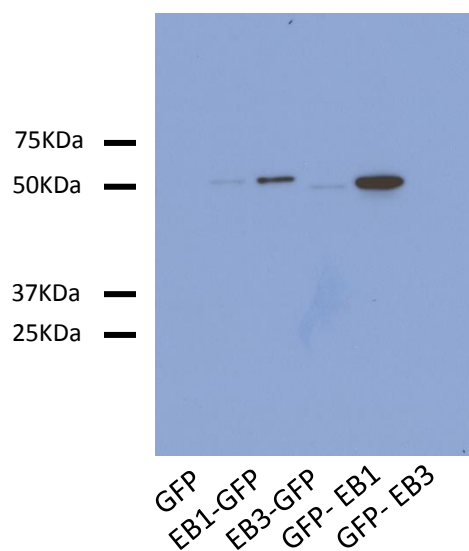

Intermediate panel 2

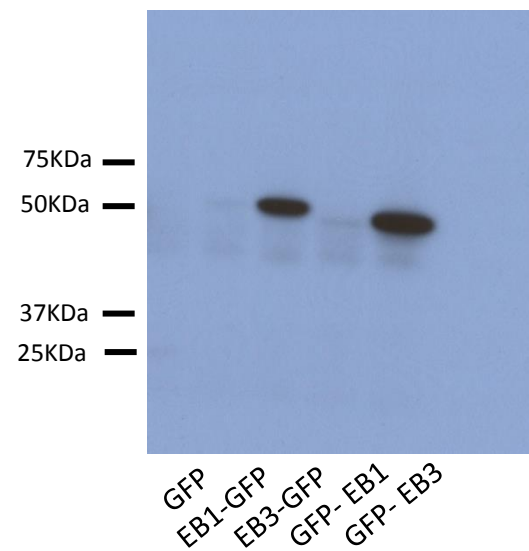

Lower panel

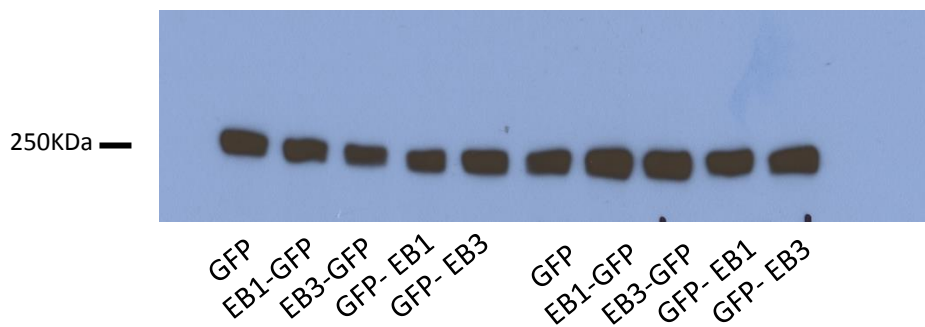

Figure 4 A

Supplement: emboj201376df4a.pdf [file emboj201376df4a.pdf]

Upper panel

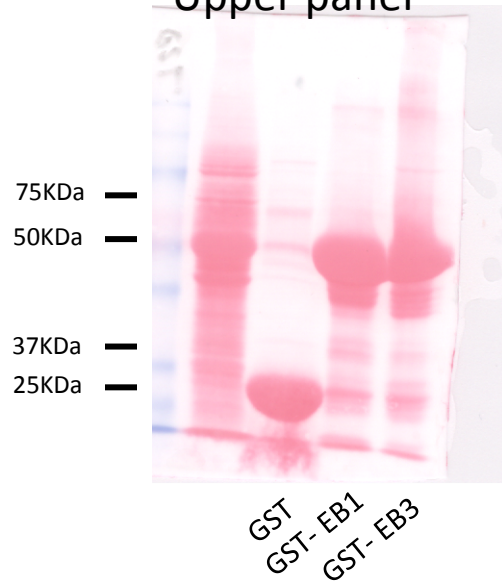

Lower panel

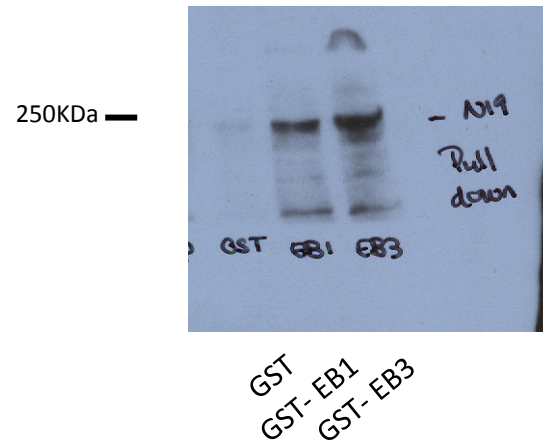

Supplement: emboj201376df4c.pdf [file emboj201376df4c.pdf]

Upper panel

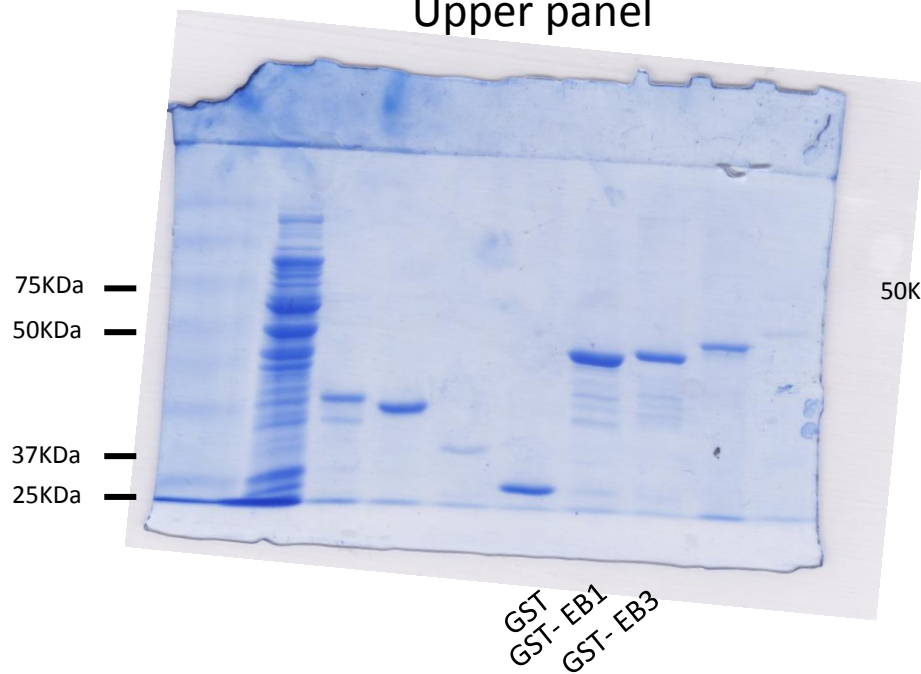

Lower panel

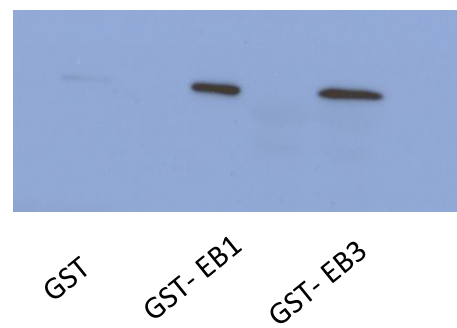

Supplement: emboj201376df4d.pdf [file emboj201376df4d.pdf]
